# Supplementary material for: Occupational Burnout Syndrome in Polish Physicians: A Systematic Review
Source: PubMed Central journal article supplement (PMC6950131; doi:10.3390/ijerph16245026), 2019-12-10
Supplement: ijerph-16-05026-s001.pdf [file ijerph-16-05026-s001.pdf]

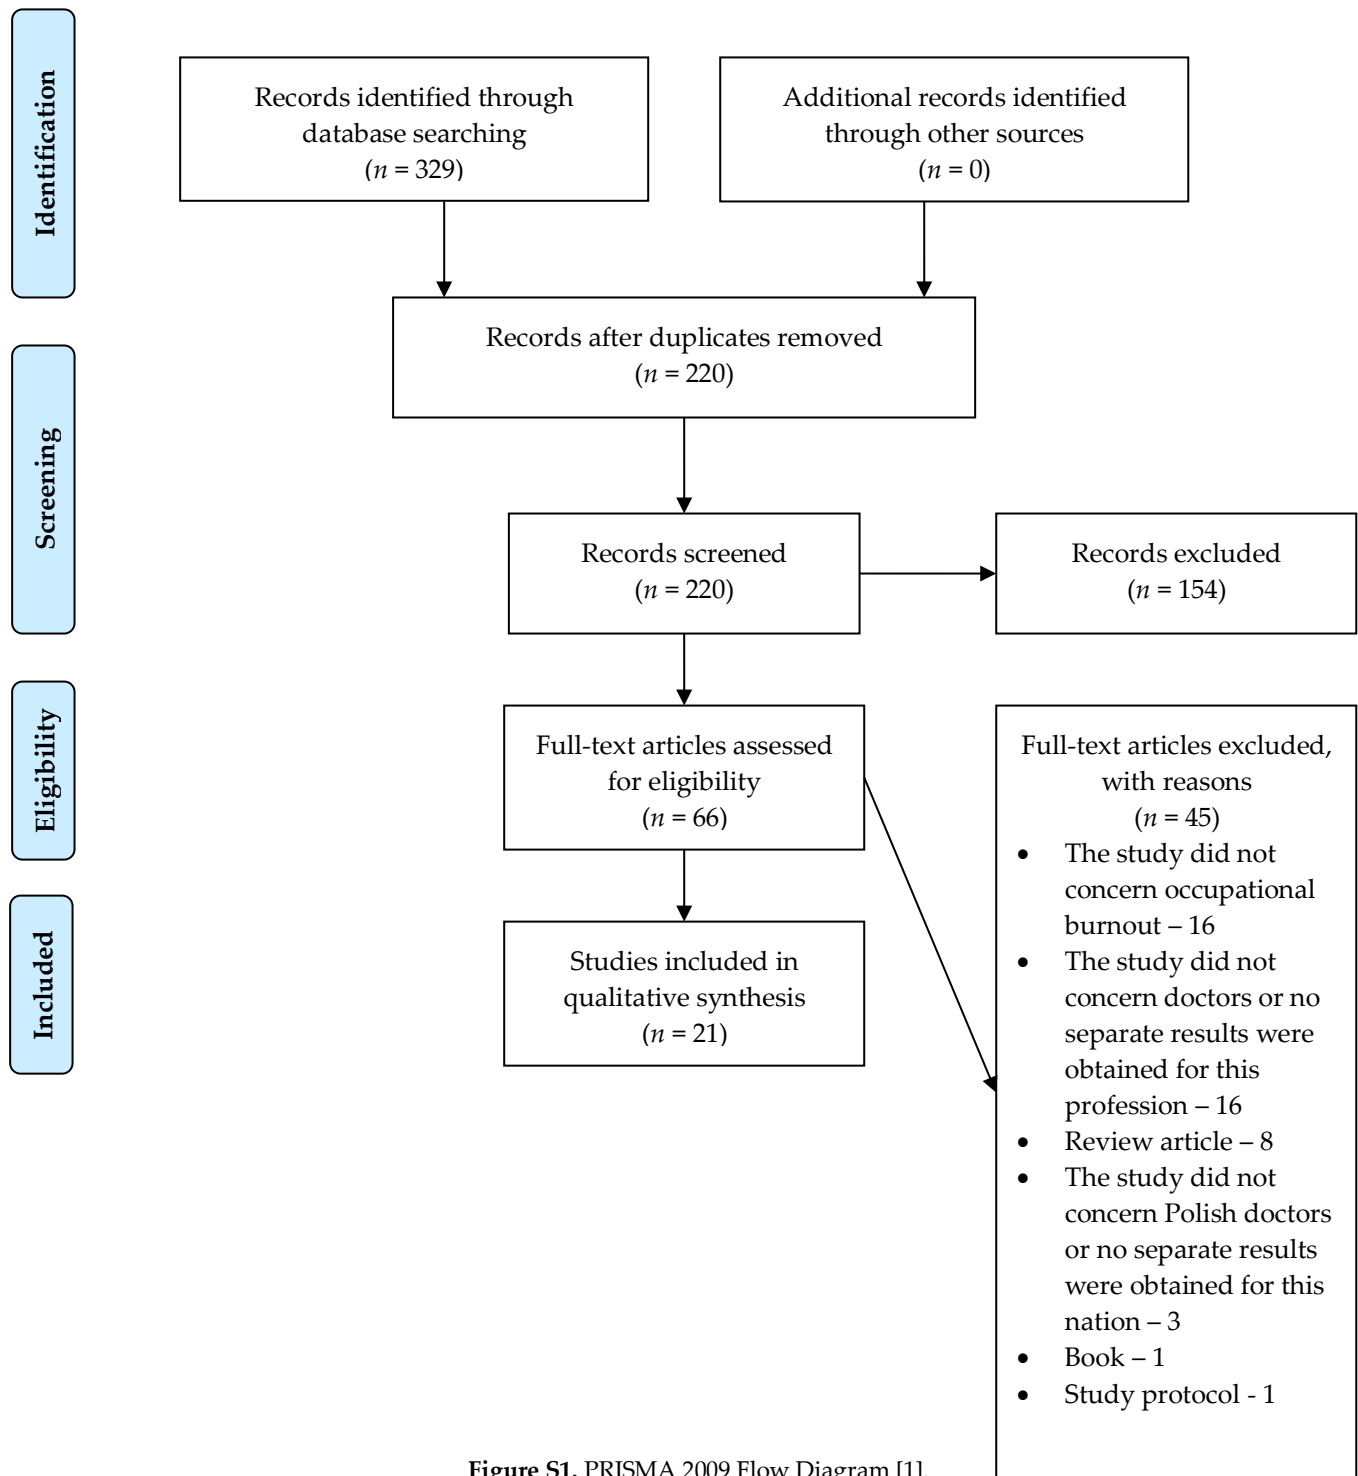

Figure S1. PRISMA 2009 Flow Diagram [1].

**Table S1.** Risk of bias assessment with the use of modified and adapted Newcastle-Ottawa Scale.

| Study              | Representativeness | Sample size | Non-Respondents | Ascertainment | Descriptive Statistics |
|--------------------|--------------------|-------------|-----------------|---------------|------------------------|
| [2]                | 0                  | 0           | 0               | 1             | 0                      |
| [3]                | 0                  | 0           | 0               | 1             | 1                      |
| [4]                | 1                  | 0           | 0               | 1             | 1                      |
| [5]                | 1                  | 0           | 0               | 1             | 1                      |
| [6]                | 1                  | 0           | 0               | 1             | 0                      |
| [7]                | 1                  | 0           | 1               | 1             | 1                      |
| [8]                | 1                  | 0           | 0               | 1             | 1                      |
| [9]                | 1                  | 0           | 0               | 1             | 0                      |
| [10]               | 1                  | 0           | 0               | 1             | 0                      |
| [11]               | 0                  | 0           | 1               | 1             | 1                      |
| Series:<br>[12–16] | 1                  | 0           | 1               | 1             | 1                      |
| [17]               | 1                  | 0           | 0               | 1             | 0                      |
| Series:<br>[18,19] | 0                  | 1           | 1               | 1             | 1                      |
| [20]               | 1                  | 0           | 0               | 1             | 0                      |
| [21]               | 0                  | 0           | 1               | 1             | 1                      |
| [22]               | 1                  | 1           | 1               | 1             | 1                      |

**Table S2.** Principles of awarding points to individual publications.

| Characteristics        | 0 points                                                                                                                                    | 1 point                                                                                                                                  |
|------------------------|---------------------------------------------------------------------------------------------------------------------------------------------|------------------------------------------------------------------------------------------------------------------------------------------|
| Representativeness     | Physicians of a single specialty and/or single institution                                                                                  | Physicians of multiple specialties and/or multiple institutions                                                                          |
| Sample size            | Number of Polish physicians participating in the study <200                                                                                 | Number of Polish physicians participating in the study ≥200                                                                              |
| Non-respondents        | No description of the response rate or no characteristics of the respondents and non-respondents                                            | Exact response rate and/or comparability between respondent and non-respondent characteristics established                               |
| Ascertainment          | Not enough details on the measurement tool/non-validated tool or a tool of uncertain validity                                               | Well described measurement tool and/or validated tool                                                                                    |
| Descriptive statistics | Descriptive statistics of the population of Polish physicians were not reported, were incomplete, or did not include measures of dispersion | Descriptive statistics of the population of Polish physicians reported in details (e.g. age, sex, seniority) with measures of dispersion |

**Note:** This is a modified version of the Newcastle-Ottawa Scale [23] used in a systematic review entitled 'Prevalence of Burnout Among Physicians. A Systematic Review' [24] adapted by the authors for the needs of this systematic review.

## References

1. Moher, D.; Liberati, A.; Tetzlaff, J.; Altman, D.G.; The PRISMA Group (2009). Preferred Reporting Items for Systematic Reviews and Meta-Analyses: The PRISMA Statement. *PLoS Med* **2009**, *6*, e1000097, doi:10.1371/journal.pmed1000097.
2. Czekajska-Chehab, E.; Okla, W.; Drop, A.; Skrzypek, M. The professional burnout syndrome in radiologists. *Ann. Univ. Mariae Curie Skłodowska Med.* **2003**, *58*, 254–260.
3. Ogińska-Bulik, N. Occupational stress and its consequences in healthcare professionals: the role of type D personality. *Int. J. Occup. Med. Environ. Health* **2006**, *19*, 113–122.

4. Głębocka, A.; Lisowska, E. Professional burnout and stress among polish physicians explained by the Hobfoll resources theory. *J. Physiol. Pharmacol.* **2007**, *58*, 243–252.
5. Kulik, M.M. Cierpienie, które przerasta, czyli o wypaleniu lekarzy pracujących z ludźmi przewlekle chorymi. *Studia z psychologii w KUL. Wyd. KUL* **2008**, *15*, 81–112.
6. Orzechowska, A.; Talarowska, M.; Drozda, R.; Mirowska, D.; Florkowski, A.; Zboralski, K.; Gałecki, P. The burnout syndrome among doctors and nurses. *Polski Merkurusz Lekarski* **2008**, *25*, 507–509.
7. Soler, J.K.; Yaman, H.; Esteva, M.; Dobbs, F.; Asenova, R.S.; Katić, M.; Ožvačić, Z.; Desgranges, J.P.; Moreau, A.; Lionis, C. Burnout in European family doctors: the EGPRN study. *Family practice* **2008**, *25*, 245–265.
8. Wojtyna, E.; Stawiarska, P. Humor styles and psychosocial working conditions in relation to occupational burnout among doctors. *Polish Psychological Bulletin* **2009**, *40*, 20–28.
9. Wypalenie zawodowe wśród personelu intensywnej opieki medycznej. Available online: <https://repozytorium.ukw.edu.pl/handle/item/1030> (accessed on 10 December 2019).
10. Walocha, E.; Tomaszewski, K.A.; Wilczek-Ruzyczka, E.; Walocha, J. Empathy and burnout among physicians of different specialities. *Folia Med. Cracov.* **2013**, *53*, 35–42.
11. Gaszynska, E.; Stankiewicz-Rudnicki, M.; Szatko, F.; Wieczorek, A.; Gaszynski, T. Life satisfaction and work-related satisfaction among anesthesiologists in Poland. *ScientificWorldJournal* **2014**, *2014*, 601865, doi:10.1155/2014/601865.
12. Tartas, M.; Walkiewicz, M.; Majkowicz, M.; Budzinski, W. Psychological factors determining success in a medical career: A 10-year longitudinal study. *Med Teach* **2011**, *33*, e163–172, doi:10.3109/0142159x.2011.544795.
13. Walkiewicz, M.; Tartas, M.; Majkowicz, M.; Budzinski, W. Academic achievement, depression and anxiety during medical education predict the styles of success in a medical career: a 10-year longitudinal study. *Med Teach* **2012**, *34*, e611–619, doi:10.3109/0142159x.2012.687478.
14. Tartas, M.; Walkiewicz, M.; Budzinski, W.; Majkowicz, M.; Wojcikiewicz, K. The sense of coherence and styles of success in the medical career: A longitudinal study. *BMC Med Educ* **2014**, *14*, 254, doi:10.1186/s12909-014-0254-5.
15. Tartas, M.; Walkiewicz, M.; Budzinski, W.; Majkowicz, M.; Wojcikiewicz, K.; Zdun-Ryzewska, A. The coping strategies during medical education predict style of success in medical career: A 10-year longitudinal study. *BMC Med Educ* **2016**, *16*, 186, doi:10.1186/s12909-016-0706-1.
16. Budziński, W.; Walkiewicz, M.; Tartas, M. The system of values and styles of success in the medical career: A longitudinal study. *Int. J. Occup. Med. Environ. Health* **2018**, *31*, doi:10.13075/ijom.1896.01298.
17. Głębocka, A. The relationship between burnout syndrome among the medical staff and work conditions in the polish healthcare system. In *Advances in Experimental Medicine and Biology*, Springer: Berlin, Germany **2017**; Vol. 968, pp 61–70.
18. Misiolek, A.; Gorczyca, P.; Misiolek, H.; Gierlotka, Z. The prevalence of burnout syndrome in Polish anaesthesiologists. *Anaesthesiol Intensive Ther.* **2014**, *46*, 155–161, doi:10.5603/ait.2014.0028.
19. Misiołek, A.; Gil-Monte, P.R.; Misiołek, H. Prevalence of burnout in Polish anesthesiologists and anesthetist nursing professionals: A comparative non-randomized cross-sectional study. *J. Health Psychol.* **2017**, *22*, 465–474, doi:10.1177/1359105315604377.
20. Grabowski, D.; Chudzicka-Czupała, A.; Chrupała-Pniak, M.; Rachwaniec-Szczecińska, Ż.; Stasiła-Sieradzka, M.; Wojciechowska, W. Work ethic, organizational commitment and burnout. *Med. Pr.* **2019**, *70*, 305–316, doi:10.13075/mp.5893.00800.
21. Leszczyński, P.; Panczyk, M.; Podgórski, M.; Owczarek, K.; Gałązkowski, R.; Mikos, M.; Charuta, A.; Zacharuk, T.; Gotlib, J. Determinants of occupational burnout among employees of the Emergency Medical Services in Poland. *Ann. Agric. Environ. Med.* **2019**, *26*, 114–119, doi:10.26444/aaem/94294.
22. Makara-Studzinska, M.; Zaluski, M.; Tylec, A.; Panasiuk, L. Do Polish doctors suffer from occupational burnout syndrome? An attempt to find an answer — Pilot study. *Ann. Agric. Environ. Med.* **2019**, *26*, 191–197, doi:10.26444/aaem/105392.
23. GA Wells, B.C., D.; Peterson, J.; Welch, V.; Losos, M.; Tugwell, P. The Newcastle-Ottawa Scale (NOS) for assessing the quality of nonrandomised studies in meta-analyses. [http://www.ohri.ca/programs/clinical\\_epidemiology/oxford.asp](http://www.ohri.ca/programs/clinical_epidemiology/oxford.asp) (accessed on 28 October 2019).
24. Rotenstein, L.S.; Torre, M.; Ramos, M.A.; Rosales, R.C.; Guille, C.; Sen, S.; Mata, D.A. Prevalence of Burnout Among Physicians: A Systematic Review. *JAMA* **2018**, *320*, 1131–1150, doi:10.1001/jama.2018.12777.
